# Supplementary material for: Reaction of β-diketiminate copper(ii) complexes and Na2S2
Source: Royal Society of Chemistry journal article supplement (doi:10.1039/b808678h), 2008-01-01
Supplement: b808678h.pdf [file b808678h.pdf]

## Supporting Information

For

### Reaction of $\beta$ -Diketiminato Copper(II) Complexes and $\text{Na}_2\text{S}_2$

**Masayuki Inosako,<sup>†</sup> Atsushi Kunishita,<sup>†</sup> Chizu Shimokawa,<sup>†</sup> Junji Teraoka,<sup>†</sup>  
Minoru Kobo,<sup>‡</sup> Takashi Ogura,<sup>‡</sup> Hideki Sugimoto<sup>†</sup> and Shinobu Itoh<sup>†,\*</sup>**

<sup>†</sup> *Departments of Chemistry and Material Sciences, Graduate School of Science, Osaka City  
University, 3-3-138 Sugimoto, Sumiyoshi-ku, Osaka 558-8585, Japan*

<sup>‡</sup> *Picobiology Research Center, Graduate School of Life Science, University of Hyogo, 3-2-1  
Koto, Kamigori-cho, Ako-gun, Hyogo 678-1297, Japan*

## Contents

Fig. S1 ESR spectrum of **3a**.

Fig. S2 ESR spectrum of **1c**.

**Fig. S1**

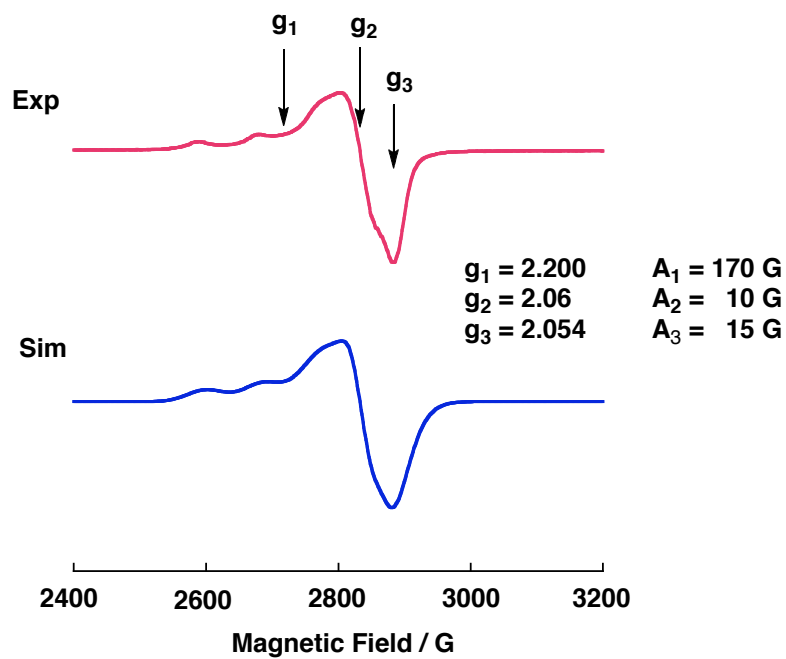

**Fig. S1** ESR spectrum of **3a** in CH<sub>2</sub>Cl<sub>2</sub> at -150°C; microwave frequency 9.40 GHz, modulation frequency 100 kHz, modulation amplitude 5 G, microwave power 0.104 mW, and its computer simulation spectrum.

**Fig. S2**

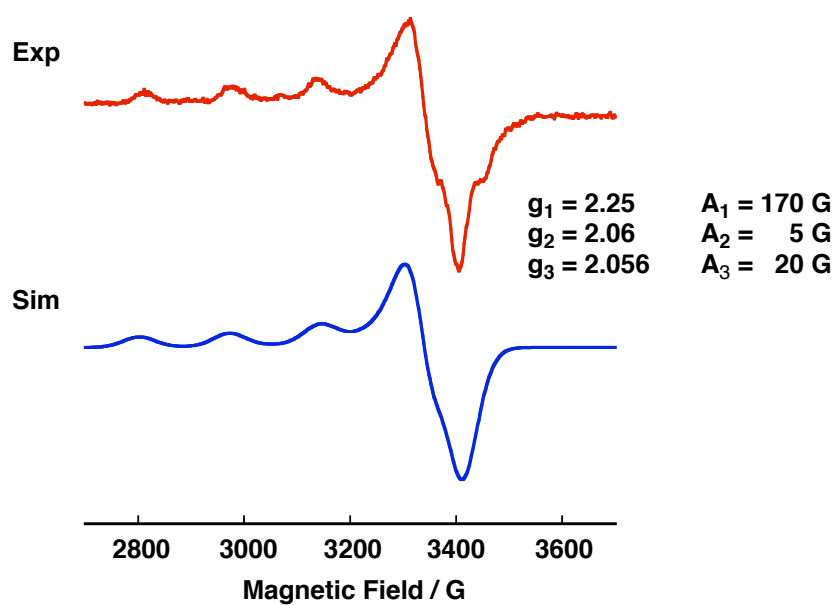

**Fig. S2** ESR spectrum of **1c** in  $\text{CH}_2\text{Cl}_2$  at  $-150^\circ\text{C}$ ; microwave frequency 9.63 GHz, modulation frequency 100 kHz, modulation amplitude 5 G, microwave power 0.520 mW, and its computer simulation spectrum.
